# Supplementary material for: Single-particle characterization of aerosols collected at a remote site in the Amazonian rainforest and an urban site in Manaus, Brazil
Source: Copernicus journal article supplement (doi:10.5194/acp-2018-1067), 2018-10-15

## Single-particle characterization of aerosols collected at a remote site in the Amazonian rainforest and an urban site in Manaus, Brazil

Li Wu<sup>1</sup>, Xue Li<sup>1</sup>, HyeKyeong Kim<sup>1</sup>, Hong Geng<sup>2</sup>, Ricardo H. M. Godoi<sup>3</sup>, Cybelli G. G. Barbosa<sup>3</sup>, Ana F. L. Godoi<sup>3</sup>, Carlos I. Yamamoto<sup>4</sup>, Rodrigo A. F. de Souza<sup>5</sup>, Christopher Pöhlker<sup>6</sup>, Meinrat O. Andreae<sup>6,7</sup>, and Chul-Un Ro<sup>1,\*</sup>

<sup>1</sup> Department of Chemistry, Inha University, Incheon, 402-751, Korea;

<sup>2</sup> Institute of Environmental Science, Shanxi University, Taiyuan 030006, China;

<sup>3</sup> Environmental Engineering Department, Federal University of Parana-UFPR, Curitiba, PR, Brazil;

<sup>4</sup> Chemical Engineering Department, Federal University of Paraná-UFPR, Curitiba, PR, Brazil;

<sup>5</sup> Amazonas State University, Superior School of Technology, Manaus, Amazonas, Brazil;

<sup>6</sup> Multiphase Chemistry & Biogeochemistry Departments, Max Planck Institute for Chemistry, 55020 Mainz, Germany;

<sup>7</sup> Department of Geology and Geophysics, King Saud University, Riyadh, Saudi Arabia.

---

\*Corresponding author. Tel.: +82 32 860 7676; fax: +82 32 874 9207  
E-mail address: [curo@inha.ac.kr](mailto:curo@inha.ac.kr) (C.-U. Ro)

Figure S1. Typical SEM images of aerosol particles for stage 1 (PM<sub>0.25-0.5</sub>), stage 2 (PM<sub>0.5-1.0</sub>), and stage 3 (PM<sub>1.0-2.0</sub>) samples of SA1 collected on Apr. 1, 2012 at the ATTO site. For convenience, ammonium sulfate, secondary organic aerosol, aluminosilicates, and reacted sea-salt are denoted as “AS”, “SOA”, “AlSi” and “rss”, respectively.

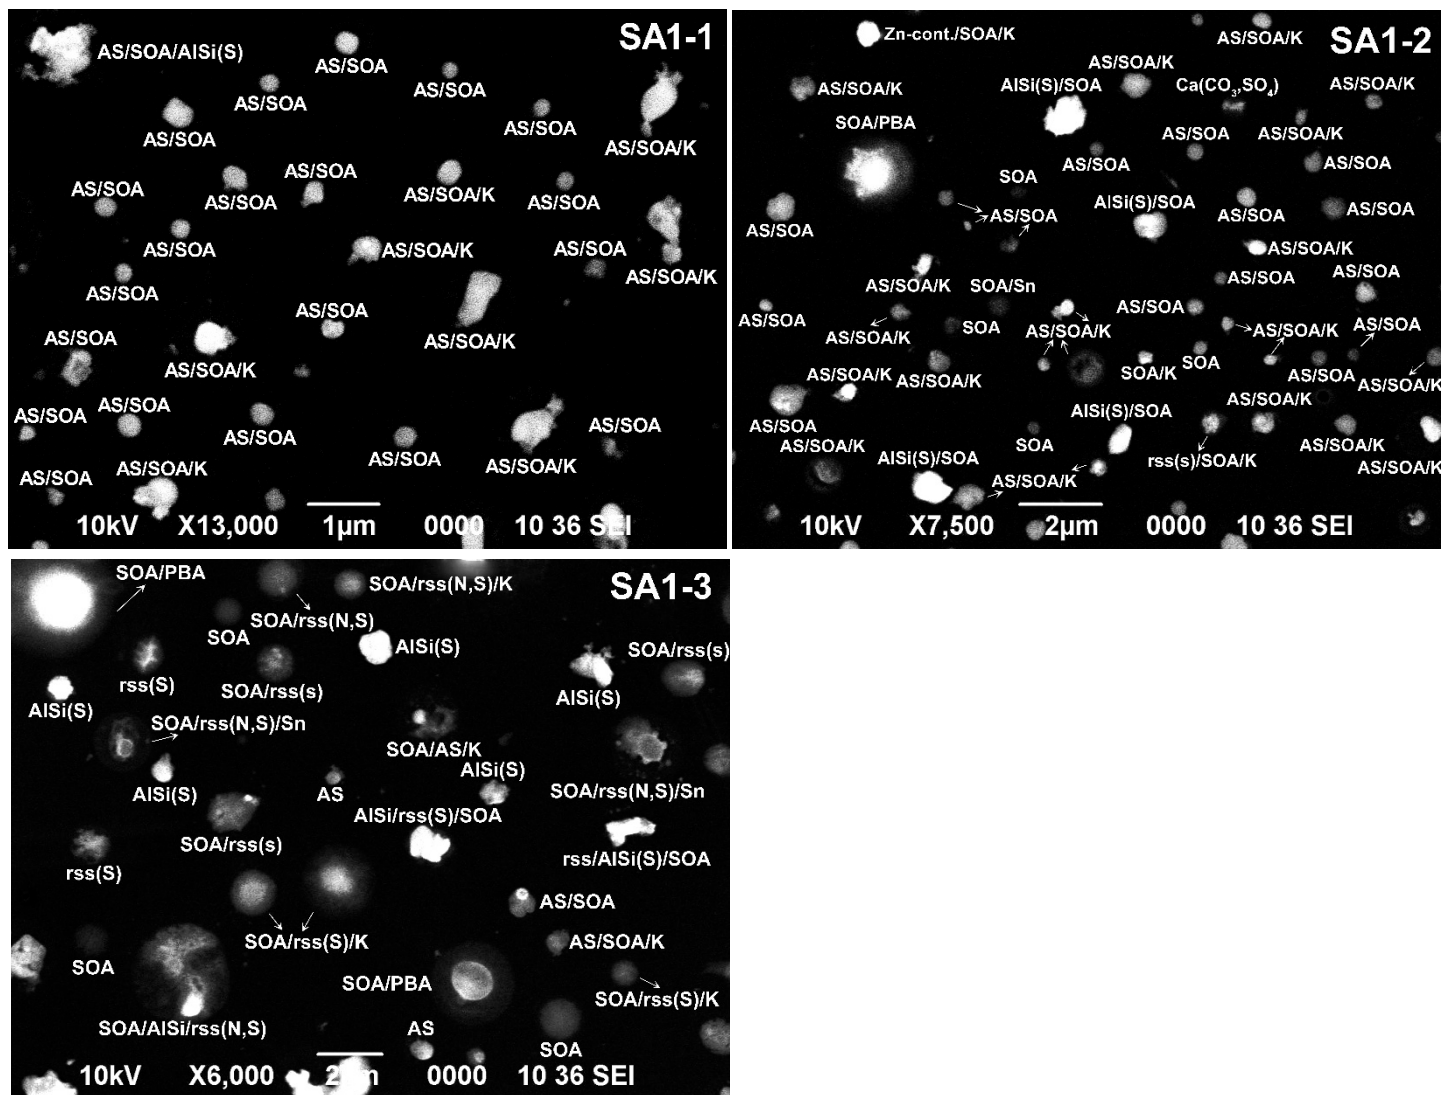

Figure S2. Typical SEM images of aerosol particles for stage 1 (PM<sub>0.25-0.5</sub>), stage 2 (PM<sub>0.5-1.0</sub>), and stage 3 (PM<sub>1.0-2.0</sub>) samples of SA2 collected on Apr. 16, 2012 at the ATTO site.

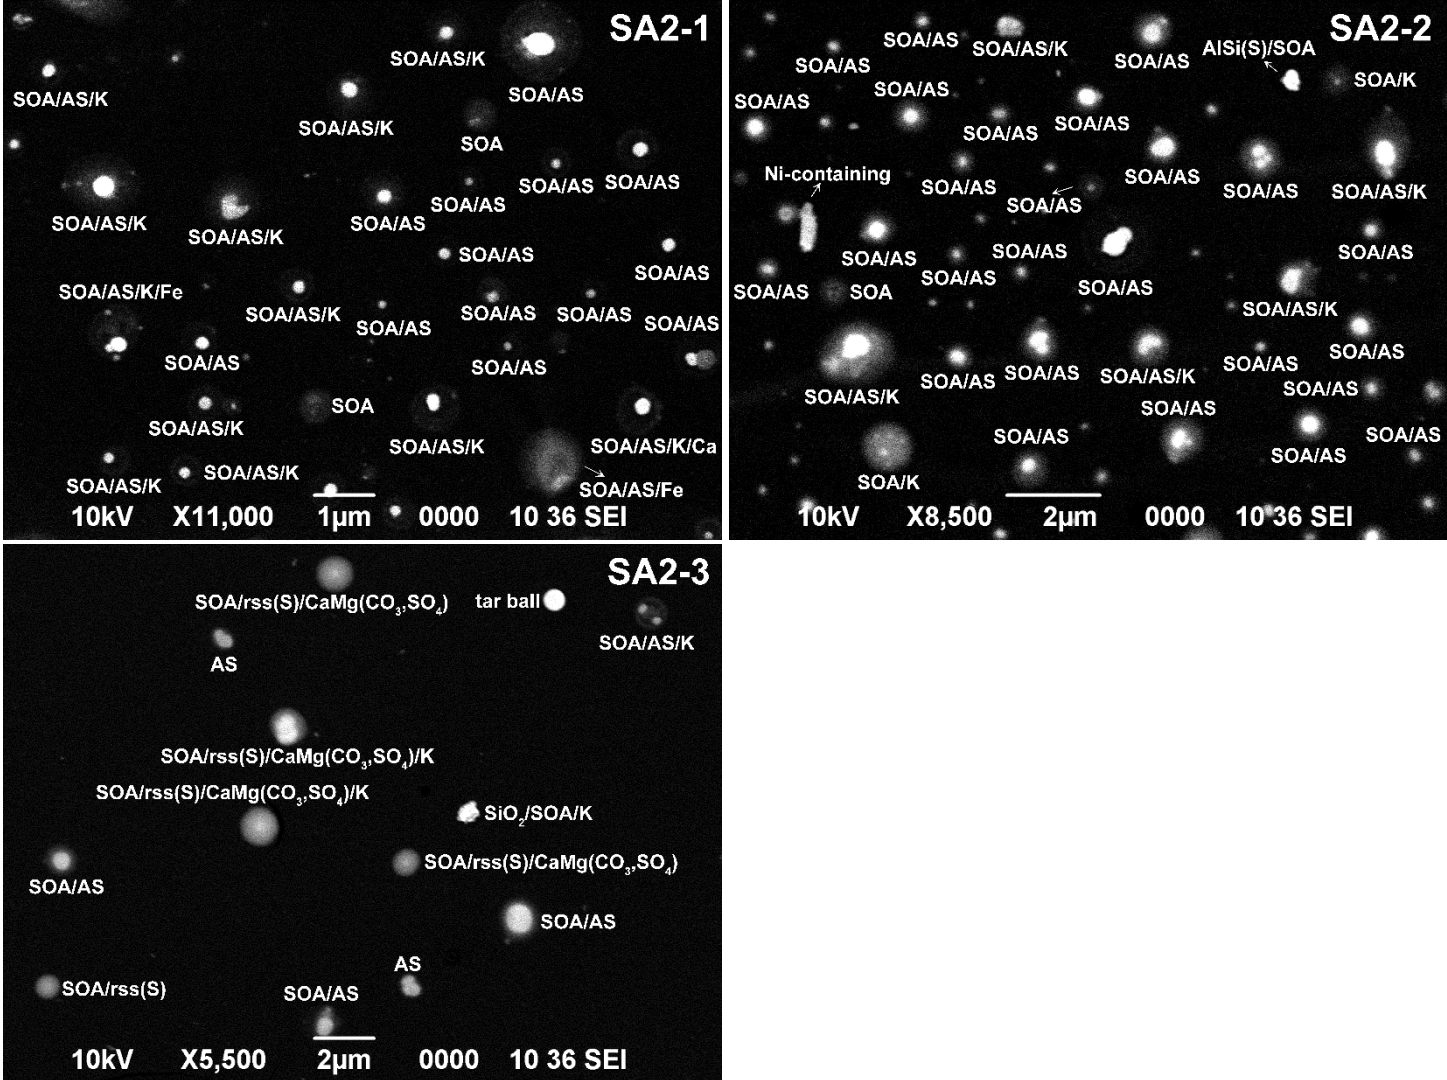

Figure S3. Typical SEM images of aerosol particles for stage 1 (PM<sub>0.25-0.5</sub>), stage 2 (PM<sub>0.5-1.0</sub>), and stage 3 (PM<sub>1.0-2.0</sub>) samples of SA3 collected on Apr. 17, 2012 at the ATTO site.

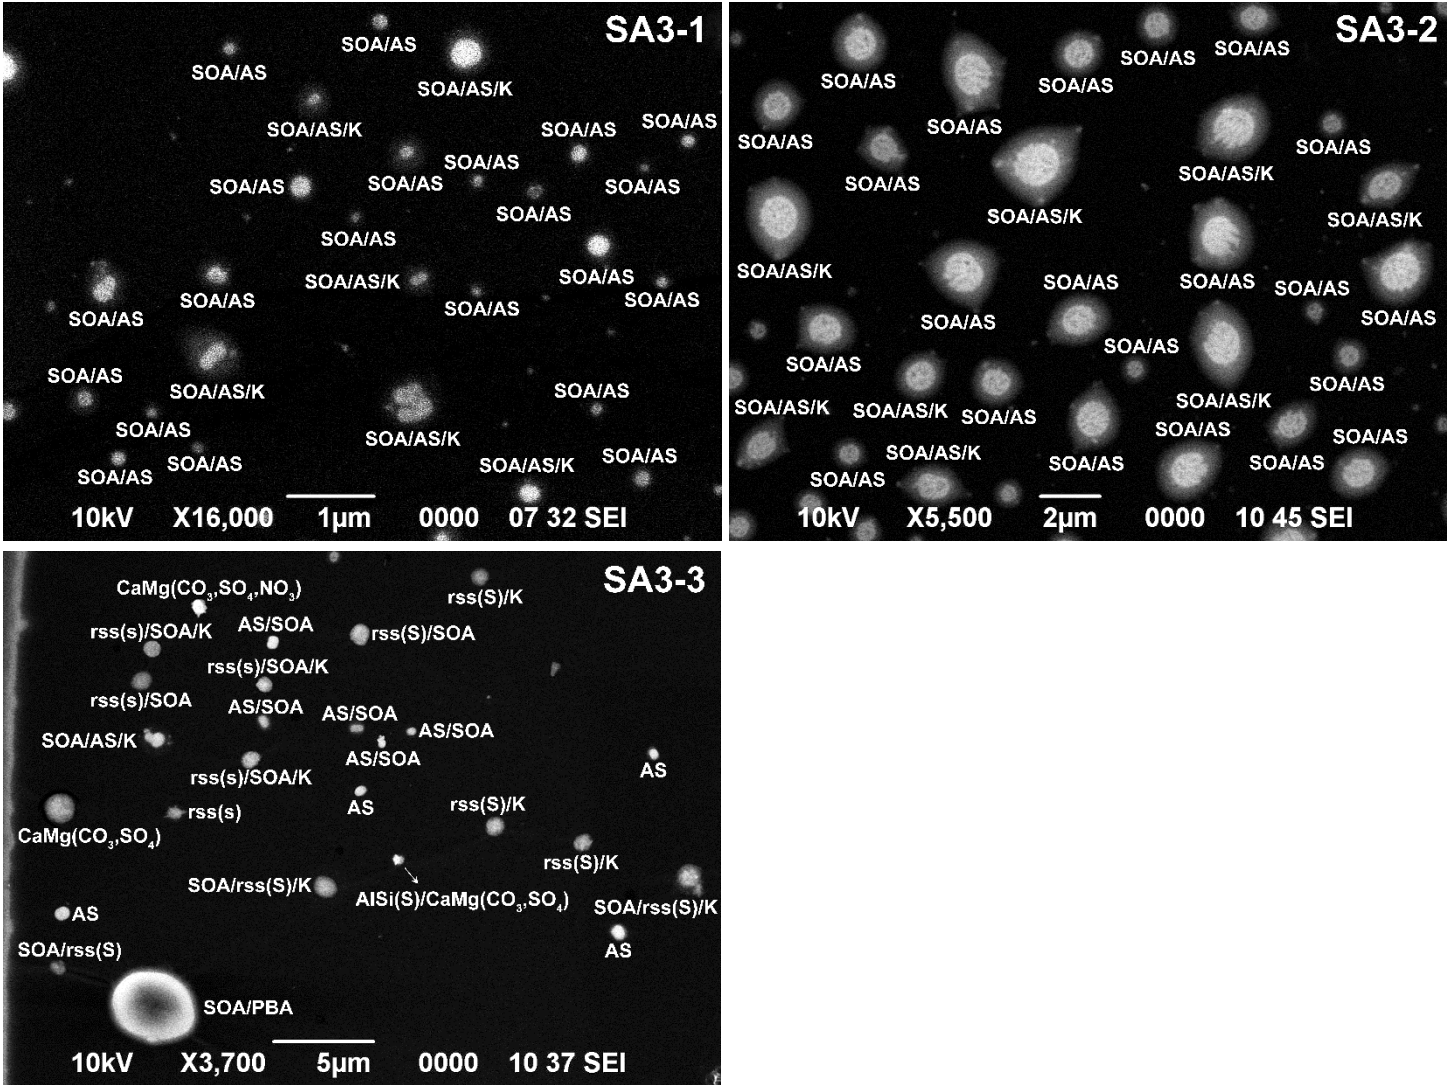

Figure S4. Typical SEM images of aerosol particles for stage 1 ( $PM_{0.25-0.5}$ ), stage 2 ( $PM_{0.5-1.0}$ ), stage 3 ( $PM_{1.0-2.0}$ ) and stage 4 ( $PM_{2.0-4.0}$ ) samples of SA4 collected on Apr. 18, 2012 at the ATTO site.

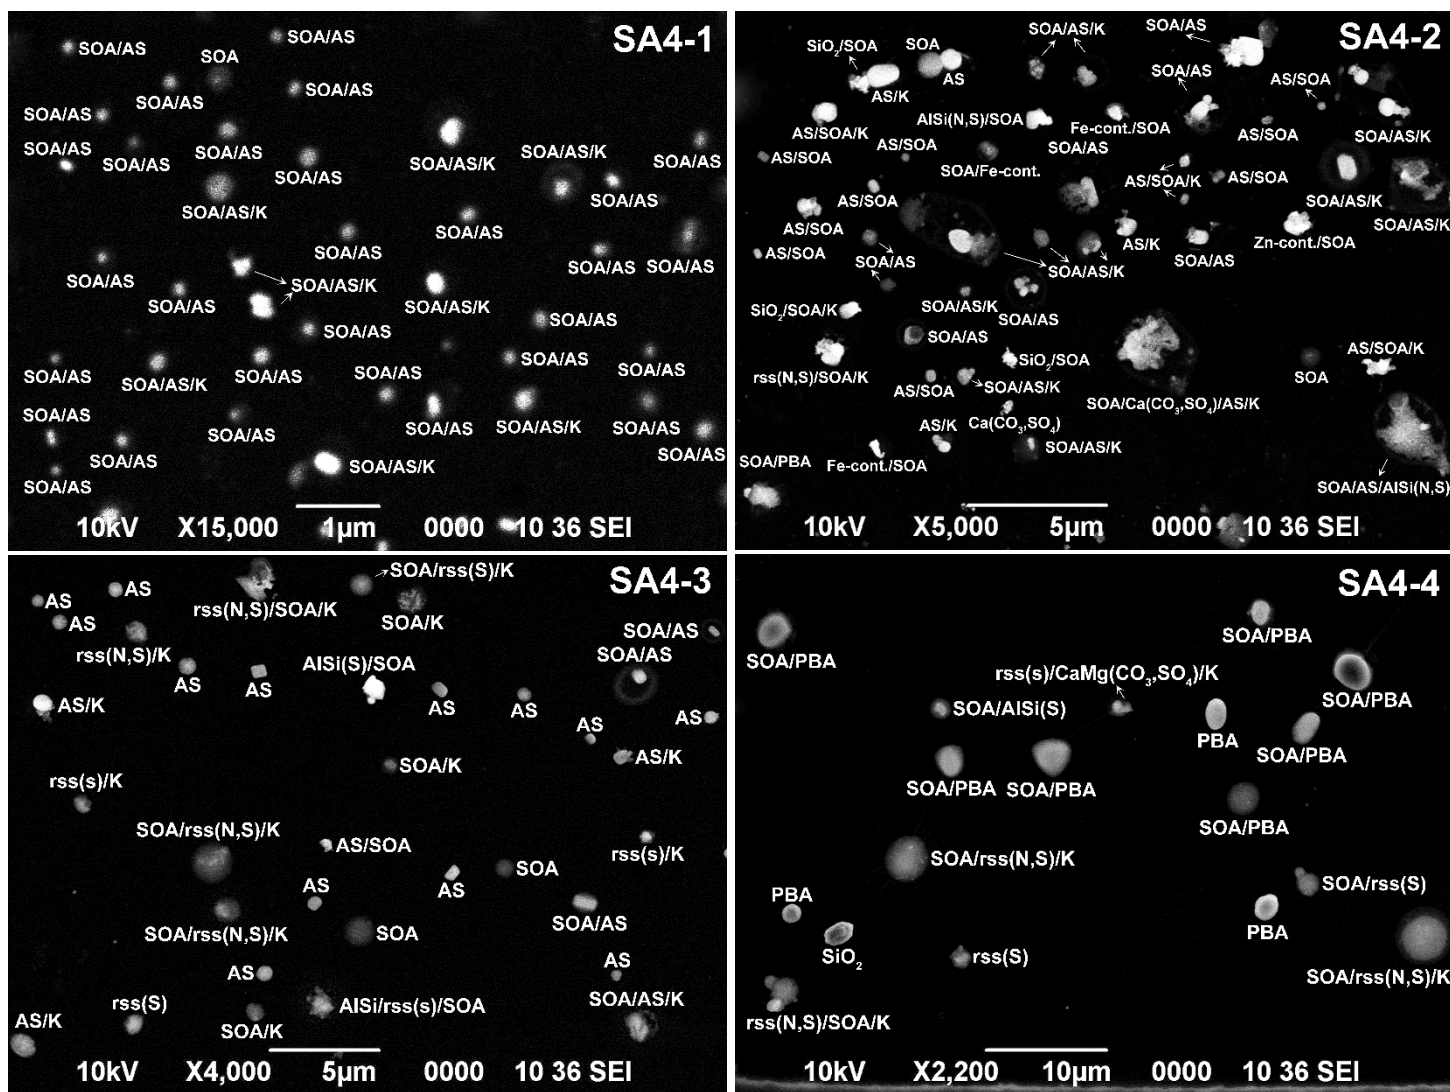

Figure S5. Typical SEM images of aerosol particles for stage 1 (PM<sub>0.25-0.5</sub>), stage 2 (PM<sub>0.5-1.0</sub>), and stage 3 (PM<sub>1.0-2.0</sub>) samples of SM1 collected on May. 1, 2012 at the Manaus site.

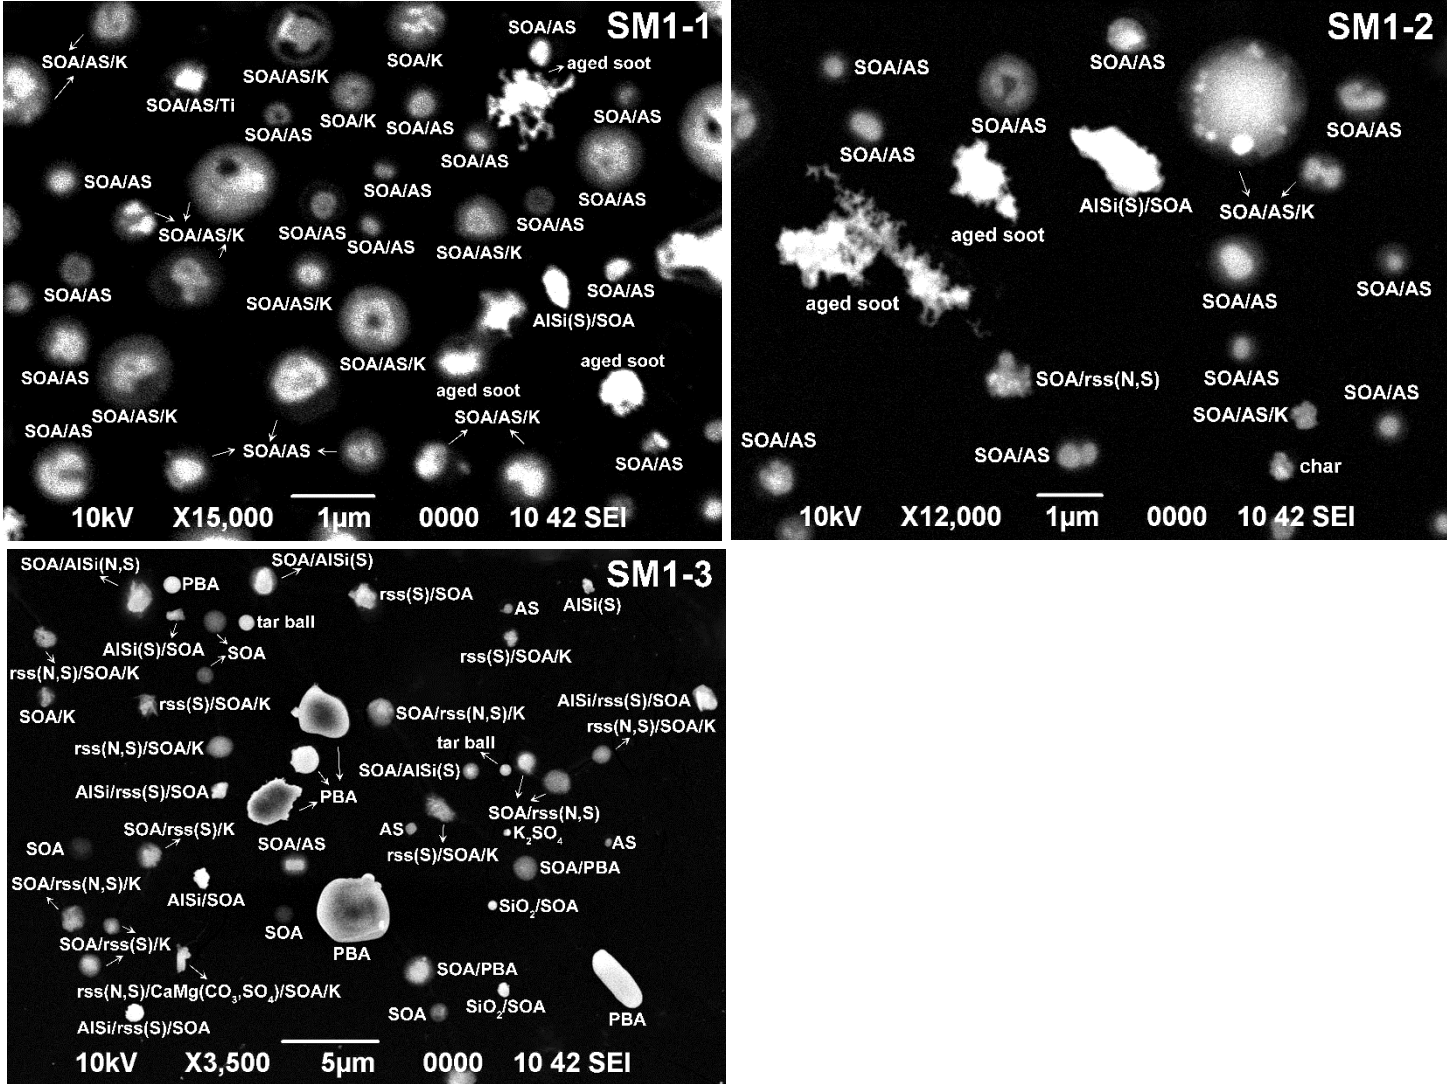





Figure S7. Typical SEM images of aerosol particles for the stage 1 (PM<sub>0.25-0.5</sub>), stage 2 (PM<sub>0.5-1.0</sub>), and stage 3 (PM<sub>1.0-2.0</sub>) samples of SM3 collected on May. 3, 2012 at the Manaus site.

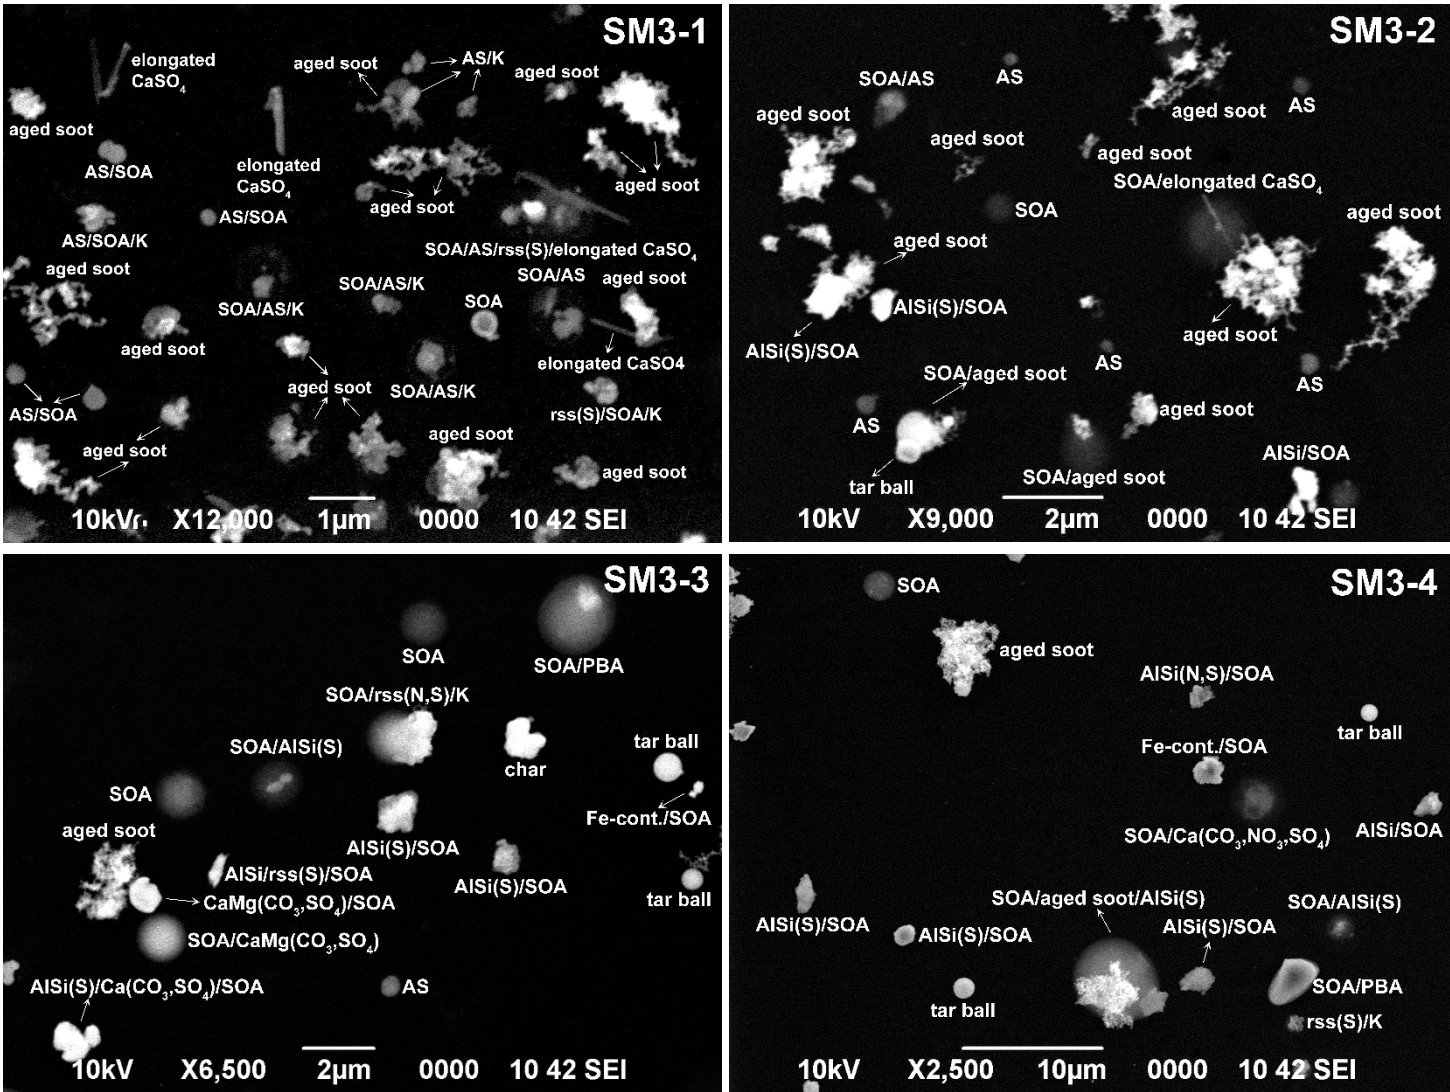

Supplement: Supplementary file 1 [file acp-2018-1067-supplement.pdf]
